# Supplementary material
Source: PubMed Central journal article supplement (PMC4809782)
Supplement: NIHMS742589-supplement.pdf [file NIHMS742589-supplement.pdf]

9/1/2015

Dear Editors of Nanomedicine,

I, Katie R. Hurley, verify that I am aware of being acknowledged in the paper titled "Magneto acoustic tomography with short pulsed magnetic field for in-vivo imaging of magnetic iron oxide nanoparticles" by Shao et al, which has been submitted for publication in the journal Nanomedicine: Nanotechnology, Biology and Medicine. I do permit this acknowledgment.

Sincerely,

A handwritten signature in black ink, appearing to read "Katie Hurley", with a long horizontal flourish extending to the right.

Katie R. Hurley

September 2, 2015

Dear Editors of Nanomedicine,

I, Michael Etheridge, verify that I am aware of being acknowledged in the paper titled " Magneto acoustic tomography with short pulsed magnetic field for in-vivo imaging of magnetic iron oxide nanoparticles " by Shao et al, which has been submitted for publication in the journal Nanomedicine: Nanotechnology, Biology and Medicine. I do permit this acknowledgment.

Sincerely,

A handwritten signature in black ink, appearing to read "Michael L. Etheridge". The signature is fluid and cursive, with the first name being the most prominent.

Michael L. Etheridge, Ph.D.
